# Supplementary material for: Tuning low-temperature CO oxidation activities via N-doping on graphene-supported three-coordinated nickle single-atom catalysts
Source: Royal Society of Chemistry journal article supplement (doi:10.1039/d2cp04975a), 2022-01-01
Supplement: d2cp04975a1.pdf [file d2cp04975a1.pdf]

## Supporting Information for

# Tuning Low-temperature CO oxidation Activities via N-doping on Graphene-Supported Three-Coordinated Nickel Single-Atom Catalysts

Tao Chen<sup>1</sup>, Yujin Ji<sup>1\*</sup>, Yi-min Ding<sup>1,2</sup>, Youyong Li<sup>1,3\*</sup>

<sup>1</sup> Institute of Functional Nano & Soft Materials (FUNSOM), Jiangsu Key Laboratory for Carbon-Based Functional Materials & Devices, Soochow University, Suzhou, Jiangsu 215123, China

<sup>2</sup> Yangtze Delta Region Institute (Huzhou), University of Electronic Science and Technology of China, Huzhou 313001, China

<sup>3</sup> Macao Institute of Materials Science and Engineering, Macau University of Science and Technology, Taipa, Macau SAR 999078, China

\*Corresponding author

E-mail: [yjji@suda.edu.cn](mailto:yjji@suda.edu.cn) (Y. Ji); [yyli@suda.edu.cn](mailto:yyli@suda.edu.cn) (Y. Li);

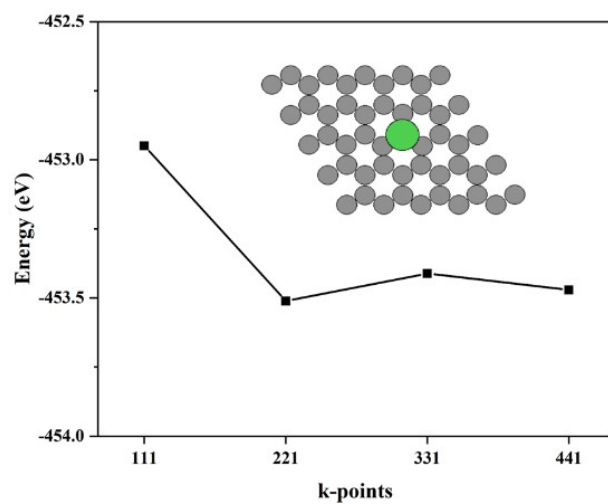

**Figure S1.** Total energies of Ni-N<sub>0</sub>C<sub>3</sub> after geometric optimization for k-points converge test.

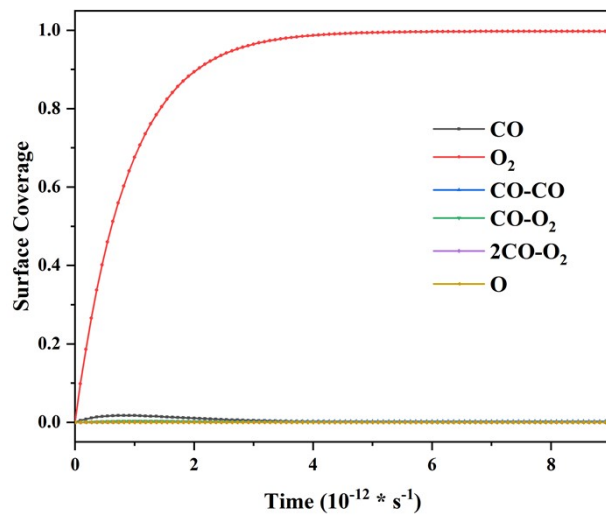

**Figure S2.** Surface coverages of reaction species numerically solved for Ni-N<sub>1</sub>C<sub>2</sub> *versus* time interval for integrating the differential equations based on the organized microkinetic model.
